# Supplementary material
Source: HighWire-hosted journal article supplement (https://erj.ersjournals.com/content/49/3/1600550)
Supplement: inline-supplementary-material-1 [file inline-supplementary-material-1.pdf]

# Predictors of Obstructive Sleep Apnoea in patients admitted for Acute Coronary Syndrome

Jordi de Batlle, Cecilia Turino, Alicia Sánchez-de-la-Torre, Jorge Abad, Joaquín Duran-Cantolla, R. Douglas McEvoy, Nick A. Antic, Olga Mediano, Valentín Cabriada, Maria José Masdeu, Joaquín Teran, Joan Valls, Ferran Barbé, Manuel Sánchez-de-la-Torre, on behalf of the Spanish Sleep Group.

## ONLINE SUPPLEMENT

**Table S1 online supplement.** Additional baseline characteristics of the ISAACC patients according to Apnoea–hypopnoea index (AHI).

|                                                        | AHI             |                 | p-value* |
|--------------------------------------------------------|-----------------|-----------------|----------|
|                                                        | < 15<br>(n=298) | ≥ 15<br>(n=680) |          |
| General characteristics                                |                 |                 |          |
| Weight (kg)                                            | 76.9 ±14        | 83.6 ±15        | <0.001   |
| Height (m)                                             | 1.68 ±0.1       | 1.68 ±0.1       | 0.784    |
| Neck circumference (cm)                                | 40.0 ±4         | 41.2 ±4         | <0.001   |
| Waist circumference (cm)                               | 99.3 ±12        | 104.6 ±12       | <0.001   |
| Hip circumference (cm)                                 | 101.4 ±9        | 105.7 ±11       | <0.001   |
| Waist to hip ratio                                     | 0.98 ±0.1       | 0.99 ±0.1       | 0.060    |
| Smoking habit                                          |                 |                 | 0.957    |
| never                                                  | 81 (27%)        | 183 (27%)       |          |
| former                                                 | 79 (27%)        | 175 (26%)       |          |
| current                                                | 138 (46%)       | 321 (47%)       |          |
| Total tobacco exposure (pack-years)                    | 28 (15-40)      | 30 (15-42)      | 0.260    |
| Alcohol habit                                          |                 |                 | 0.193    |
| never                                                  | 209 (72%)       | 476 (73%)       |          |
| former                                                 | 7 (2%)          | 6 (1%)          |          |
| current                                                | 76 (26%)        | 174 (26%)       |          |
| Clinical characteristics and biological determinations |                 |                 |          |
| Systolic blood pressure (mm Hg)                        | 124 ±19         | 126 ±19         | 0.240    |
| Diastolic blood pressure (mm Hg)                       | 73 ±12          | 73 ±12          | 0.939    |
| Heart rate (bpm)                                       | 71 ±13          | 72 ±14          | 0.252    |
| NYHA class                                             |                 |                 | 0.111    |

|                                        |             |             |       |
|----------------------------------------|-------------|-------------|-------|
| I                                      | 159 (96%)   | 309 (90%)   |       |
| II                                     | 7 (4%)      | 27 (8%)     |       |
| III                                    | 0 (0%)      | 4 (1%)      |       |
| IV                                     | 0 (0%)      | 3 (1%)      |       |
| Catheterization                        | 281 (97%)   | 651 (96%)   | 0.723 |
| Obstruction                            | 90 (80-100) | 99 (90-100) | 0.040 |
| Diseased vessels n                     |             |             | 0.440 |
| 1                                      | 145 (53%)   | 303 (48%)   |       |
| 2                                      | 74 (27%)    | 187 (30%)   |       |
| ≥3                                     | 55 (20%)    | 142 (22%)   |       |
| Stents implanted n                     | 1.4 ±1      | 1.5 ±0.9    | 0.451 |
| White cells(million/mm <sup>3</sup> )  | 9.8 ±3.1    | 9.8 ±3.3    | 0.969 |
| Red cells (million/mm <sup>3</sup> )   | 4.7 ±0.6    | 4.6 ±0.7    | 0.421 |
| Platelets (thousands/mm <sup>3</sup> ) | 219 ±66     | 214 ±61     | 0.235 |
| Prothrombin time (%)                   | 82 ±33      | 83 ±32      | 0.699 |
| Prothrombin time (s)                   | 22 (11-30)  | 20 (11-30)  | 0.912 |
| International normalized ratio         | 1.12 ±0.4   | 1.13 ±0.5   | 0.655 |
| HDL cholesterol (mg/dL)                | 41.7 ±12    | 40.3 ±11    | 0.123 |
| LDL cholesterol (mg/dL)                | 113 ±39     | 110 ±37     | 0.236 |
| Aspartate transaminase (UI/L)          | 37 (25-72)  | 38 (23-70)  | 0.888 |
| Alanine transaminase (UI/L)            | 30 (20-45)  | 29 (21-42)  | 0.761 |
| <b>Other pharmacological treatment</b> |             |             |       |
| Anticoagulants                         | 14 (5%)     | 46 (7%)     | 0.230 |
| Antacids                               | 68 (23%)    | 177 (26%)   | 0.310 |
| Antiplatelets                          | 55 (19%)    | 157 (23%)   | 0.122 |
| Bronchodilators                        | 19 (7%)     | 25 (4%)     | 0.056 |

n (%), Mean ±SD or Median (P25-P75) as appropriate.

\* Chi-square test, one-way ANOVA or Mann-Whitney test as appropriate.
